# Supplementary material for: Topographic Variation of the Growth Rate of Geographic Atrophy in Nonexudative Age-Related Macular Degeneration: A Systematic Review and Meta-analysis
Source: PubMed Central journal article supplement — Invest Ophthalmol Vis Sci. 2020 Jan 29;61(1):2. doi: 10.1167/iovs.61.1.2 (PMC7205189; doi:10.1167/iovs.61.1.2), 2020-01-29
Supplement: iovs-61-1-2_s001.pdf [file iovs-61-1-2_s001.pdf]

# Supplementary Figure S1

## A. GA Area Growth Rate in Center Point Involved GA

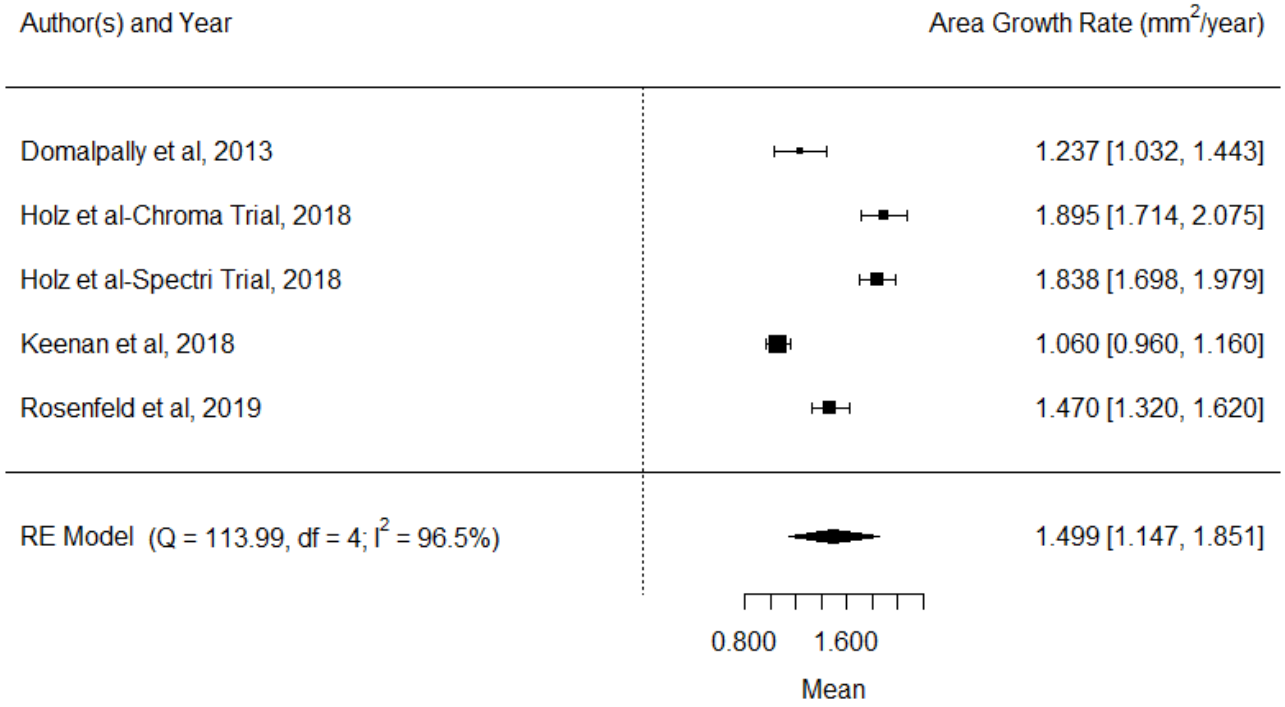

## B. GA Area Growth Rate in Center Point Spared GA

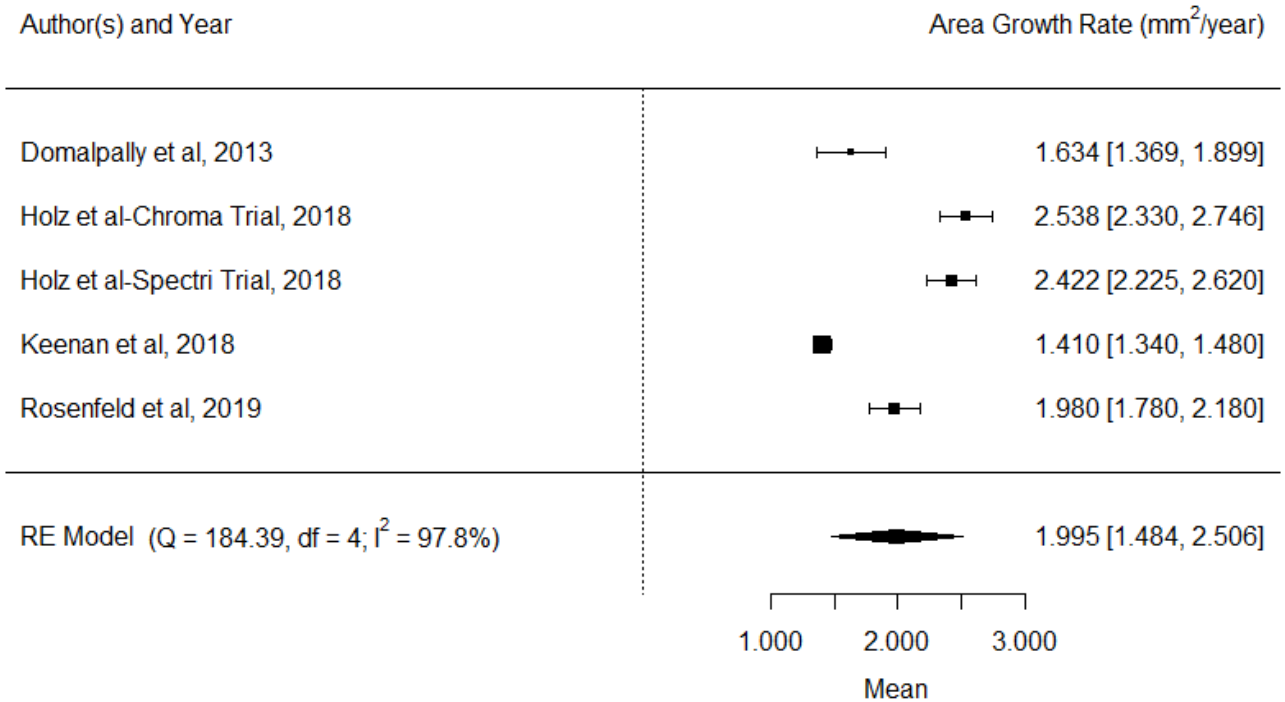

### C. Area Growth Rate in Foveal Zone Involved GA

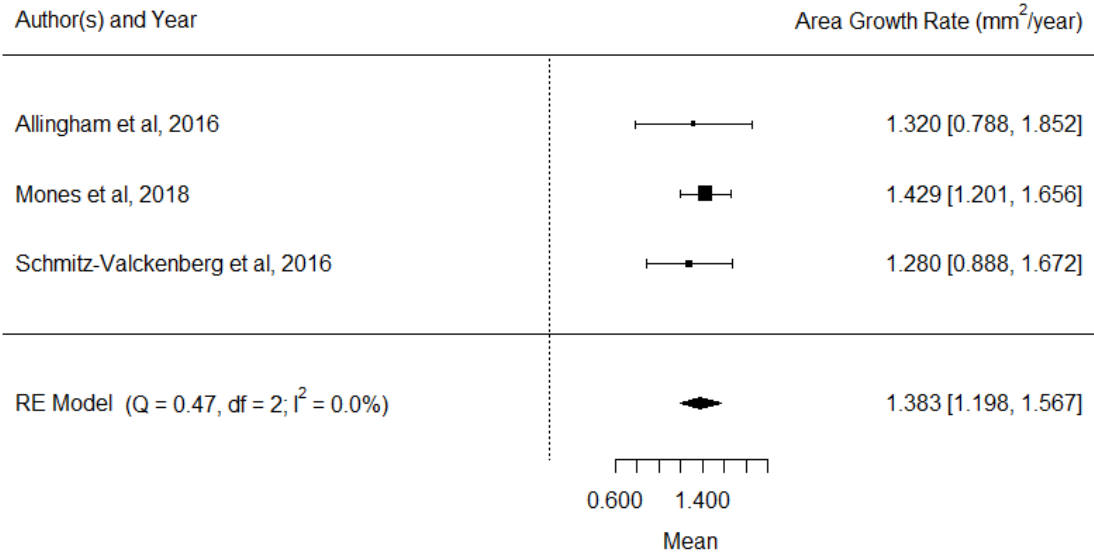

### D. Area Growth Rate in Foveal Zone Spared GA

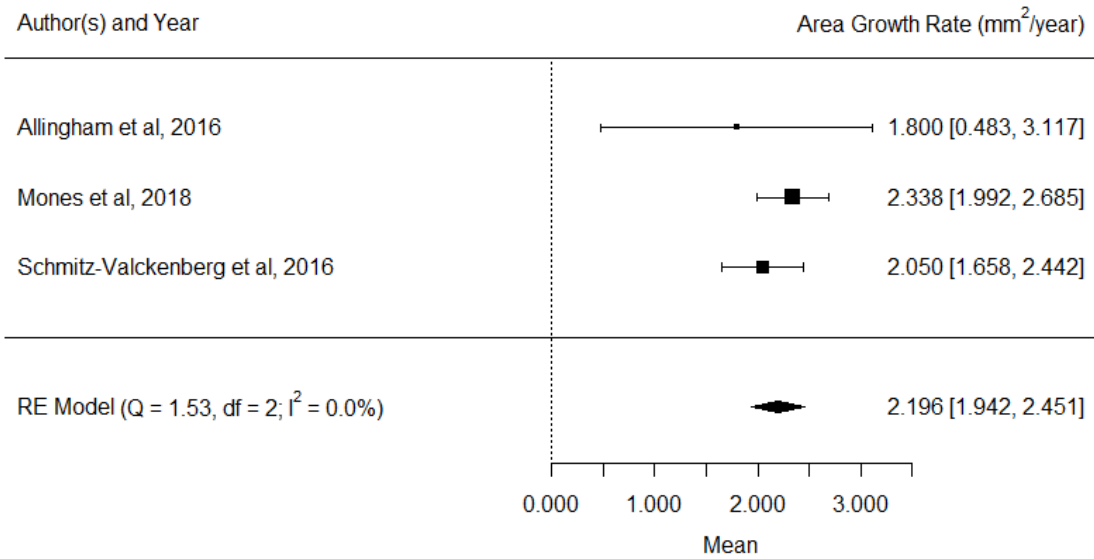

**Figure S1.** Random-effects meta-analysis estimating the GA area growth rate (in mm<sup>2</sup>/year) in (A) center point involved, (B) center point spared, (C) foveal zone involved and (D) foveal zone spared groups. Each diamond represents the overall effect estimate for the group (width of the diamond represents the 95% confidence interval). For each individual study, the square marker size is proportional to the weight used in meta-analyses, and the line represents the 95% confidence interval. (E) Summarizes the mean and standard error of the GA area growth rates in all 4 groups. GA, geographic atrophy.
