# Supplementary material for: Topographic Variation of the Growth Rate of Geographic Atrophy in Nonexudative Age-Related Macular Degeneration: A Systematic Review and Meta-analysis
Source: PubMed Central journal article supplement — Invest Ophthalmol Vis Sci. 2020 Jan 29;61(1):2. doi: 10.1167/iovs.61.1.2 (PMC7205189; doi:10.1167/iovs.61.1.2), 2020-01-29
Supplement: iovs-61-1-2_s002.pdf [file iovs-61-1-2_s002.pdf]

# Supplementary Figure S2

## A. Area Growth Rate in Center Point Involved GA is Lower than Center Point Spared GA

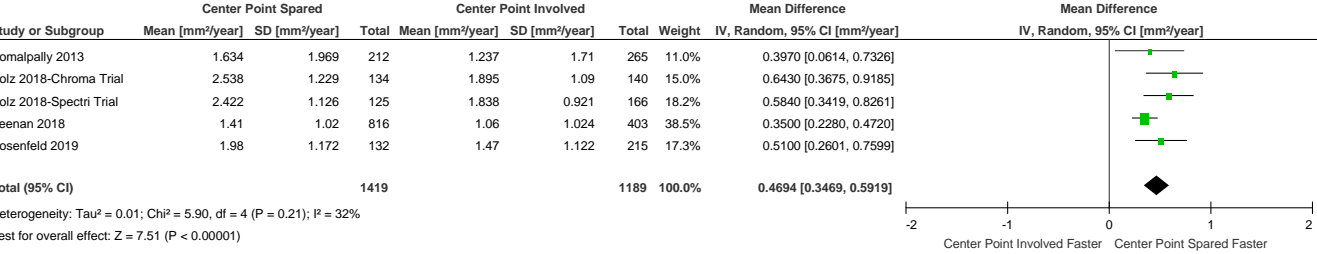

## B. Area Growth Rate in Foveal Zone Involved GA is Lower than Foveal Zone Spared GA

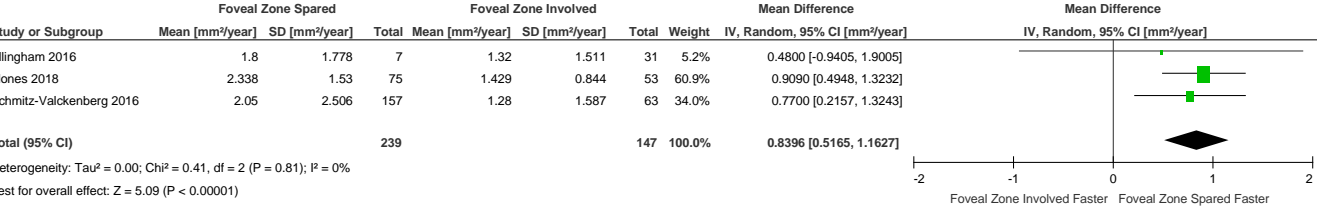

**Figure S2.** Random-effects meta-analysis comparing the area growth rates (in mm<sup>2</sup>/year) of GA lesions with different lesion locations. **A**, In the GA location classification 1, the area growth rate in center point spared group is 0.47 mm<sup>2</sup>/year (31.3%) faster than center point involved group (P < 0.001). **B**, In the GA location classification 2, the difference in the area growth rate is much larger (0.84 mm<sup>2</sup>/year; 60.9%) between foveal zone spared and foveal zone involved group (P < 0.001). The diamond represents the overall effect estimate (width of the diamond represents the 95% CIs). For each individual study, different data marker sizes indicate weight and the lines represent the 95% CIs. SD = standard deviation; CI = confidence interval.
