# Supplementary material for: Topographic Variation of the Growth Rate of Geographic Atrophy in Nonexudative Age-Related Macular Degeneration: A Systematic Review and Meta-analysis
Source: PubMed Central journal article supplement — Invest Ophthalmol Vis Sci. 2020 Jan 29;61(1):2. doi: 10.1167/iovs.61.1.2 (PMC7205189; doi:10.1167/iovs.61.1.2), 2020-01-29
Supplement: iovs-61-1-2_s003.pdf [file iovs-61-1-2_s003.pdf]

### Supplementary Figure S3

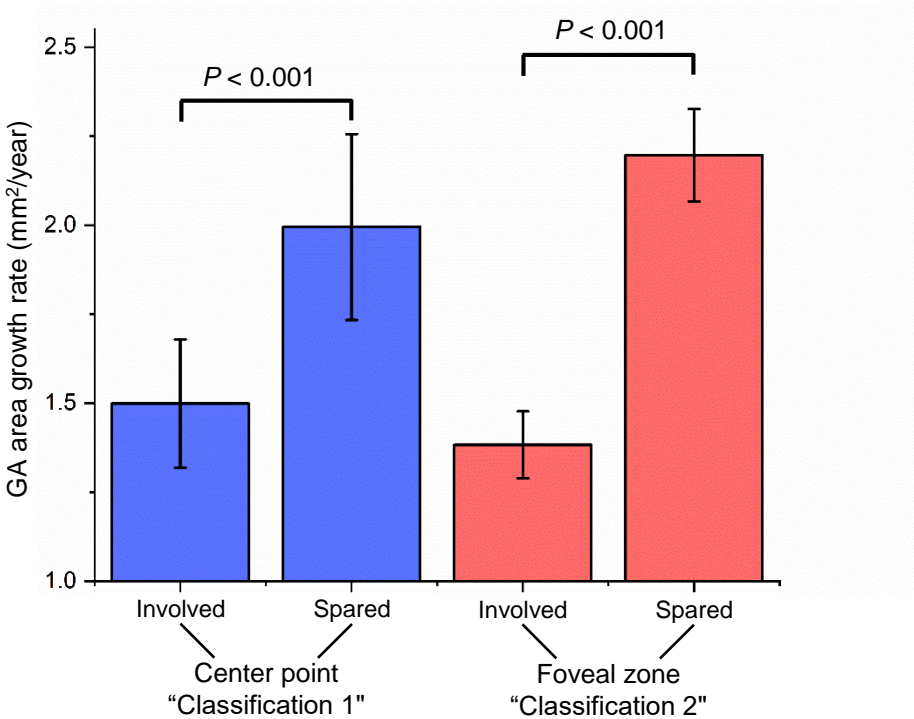

**Figure S3.** GA area growth rates (mm<sup>2</sup>/year) in 4 GA location groups. The GA area growth rate in each group was calculated from a random-effects meta-analysis shown in Supplementary Figure S1. The *P* values between the pair in classification 1 (i.e. classifying GA lesions based on center point involvement) and between the pair in classification 2 (i.e. classifying GA lesions based on foveal zone involvement) are from the random-effects meta-analyses shown in Supplementary Figure S2. The error bar represents the standard error. GA, geographic atrophy.
