# Supplementary material for: Topographic Variation of the Growth Rate of Geographic Atrophy in Nonexudative Age-Related Macular Degeneration: A Systematic Review and Meta-analysis
Source: PubMed Central journal article supplement — Invest Ophthalmol Vis Sci. 2020 Jan 29;61(1):2. doi: 10.1167/iovs.61.1.2 (PMC7205189; doi:10.1167/iovs.61.1.2), 2020-01-29
Supplement: iovs-61-1-2_s004.pdf [file iovs-61-1-2_s004.pdf]

# Supplementary Figure S4

## A. Effective Radius Growth Rate in Center Point Involved GA

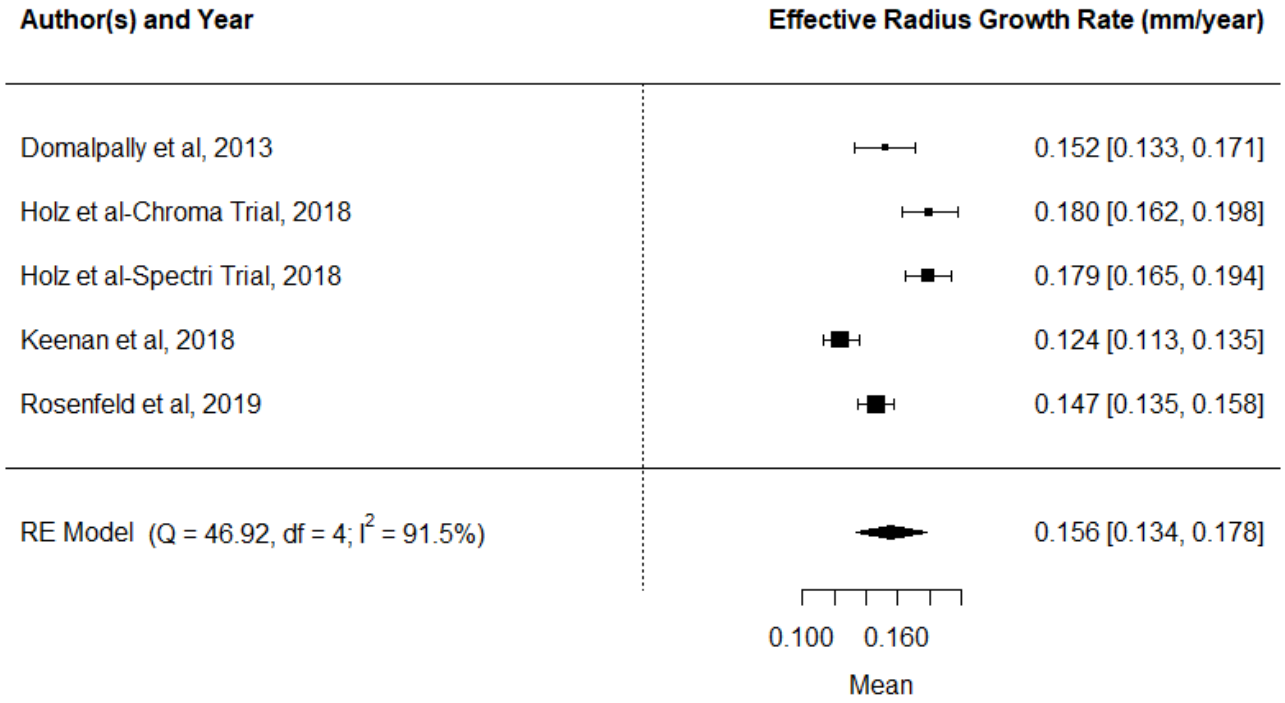

## B. Effective Radius Growth Rate in Center Point Spared GA

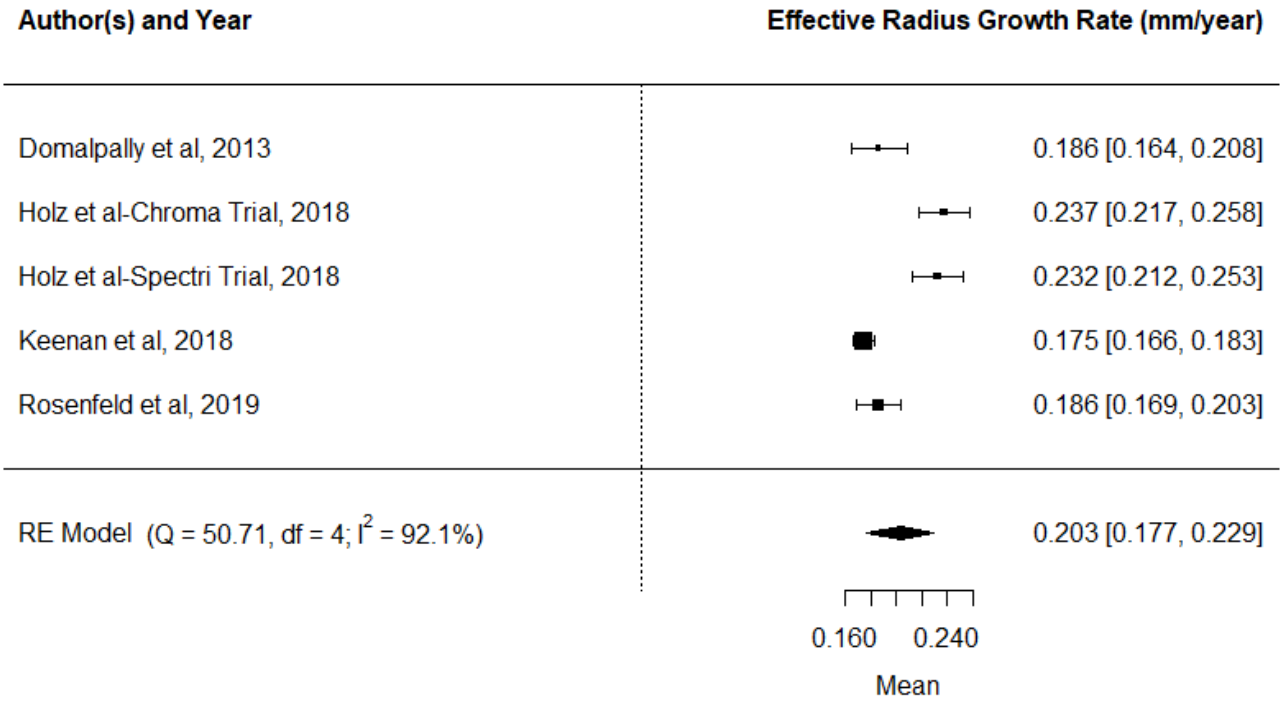

C. Effective Radius Growth Rate in Foveal Zone Involved GA

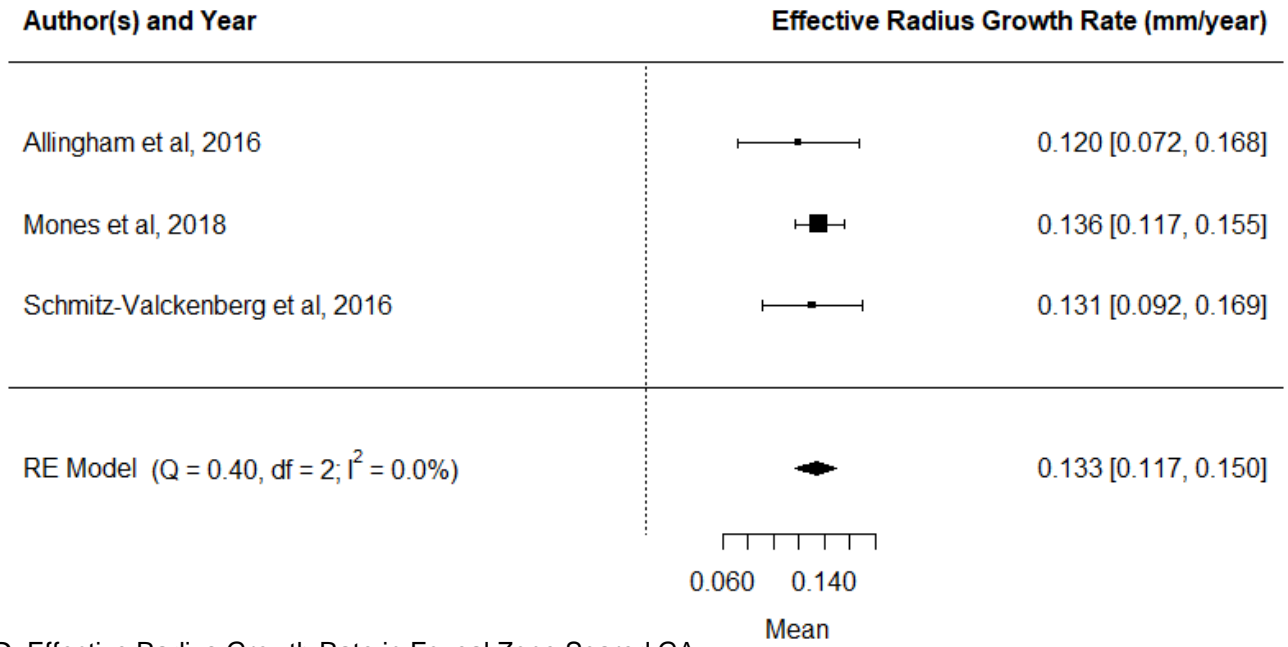

D. Effective Radius Growth Rate in Foveal Zone Spared GA

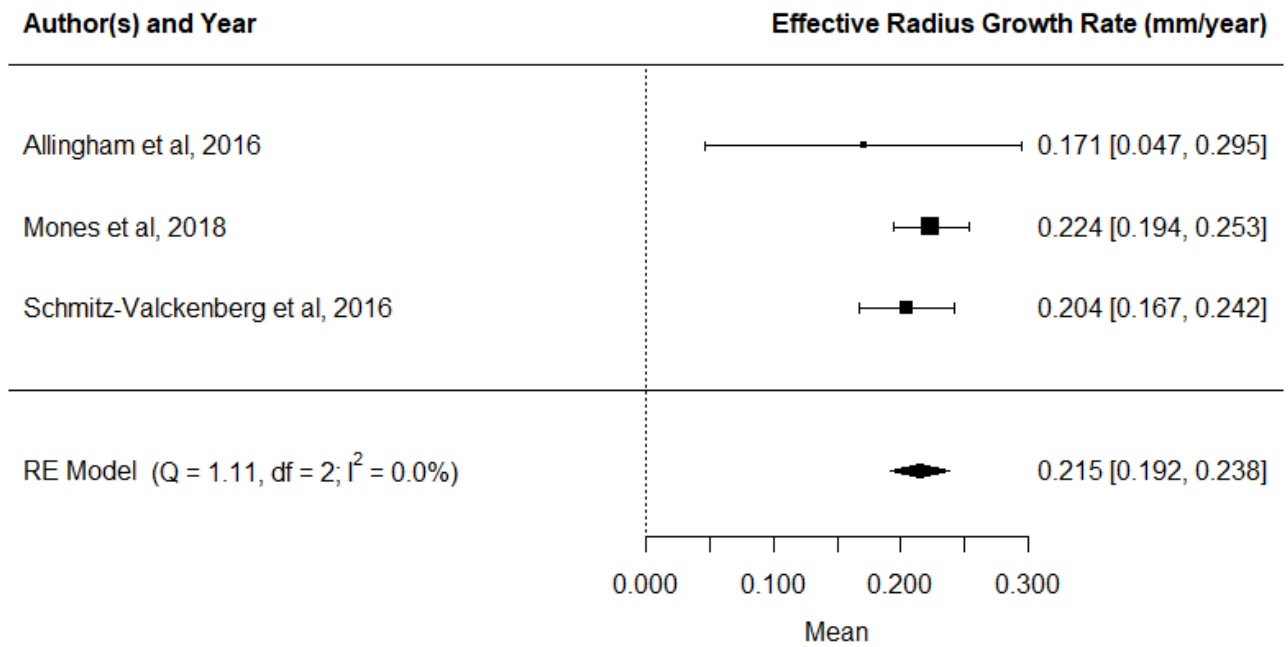

**Figure S4.** Random-effects meta-analysis estimating the GA effective radius growth rate (in mm/year) in (A) center point involved, (B) center point spared, (C) foveal zone involved, and (D) foveal zone spared groups. Each diamond represents the overall effect estimate for a group (width of the diamond represents the 95% confidence interval). For each individual study, the square marker size is proportional to the weight used in meta-analyses, and the line represents the 95% confidence interval. GA, geographic atrophy.
