# Supplementary material for: Topographic Variation of the Growth Rate of Geographic Atrophy in Nonexudative Age-Related Macular Degeneration: A Systematic Review and Meta-analysis
Source: PubMed Central journal article supplement — Invest Ophthalmol Vis Sci. 2020 Jan 29;61(1):2. doi: 10.1167/iovs.61.1.2 (PMC7205189; doi:10.1167/iovs.61.1.2), 2020-01-29
Supplement: iovs-61-1-2_s005.pdf [file iovs-61-1-2_s005.pdf]

## A. GA Effective Radius Growth Rate in Prospective Interventional Studies

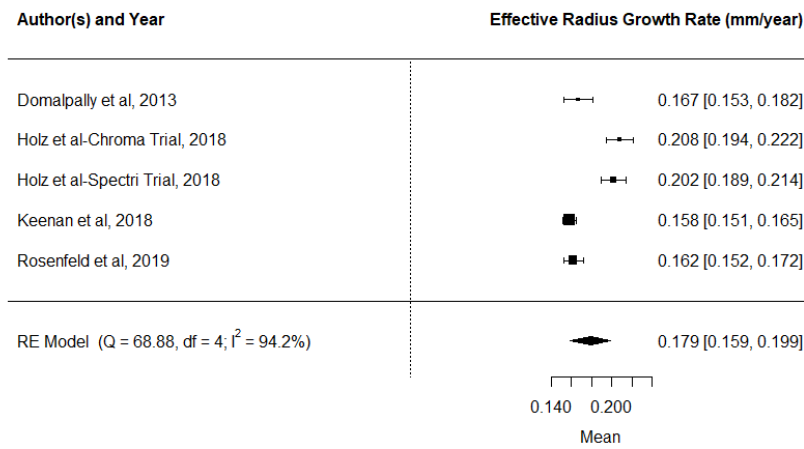

## B. GA Effective Radius Growth Rate in Prospective Observational Studies

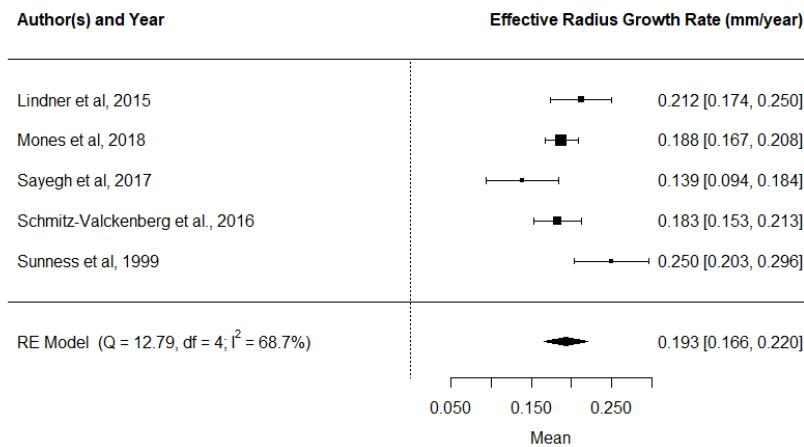

## C. Comparison in GA Effective Radius Growth Rate Between Study Types

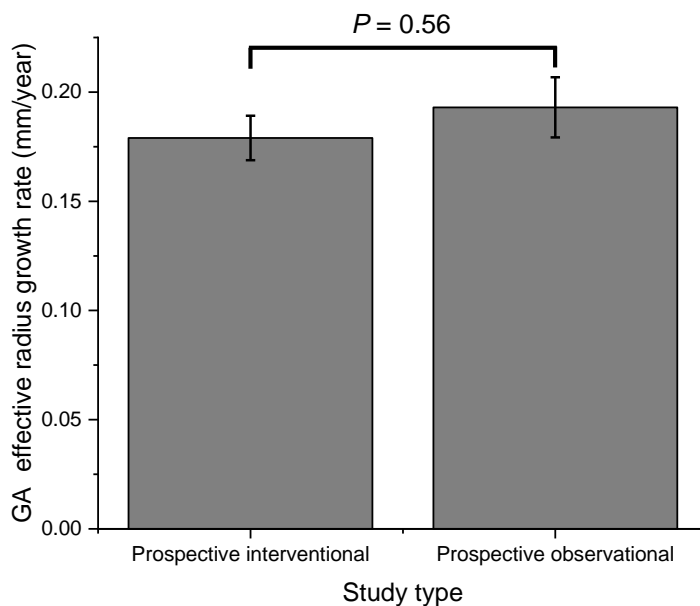

**Figure S5.** GA effective radius growth rates based on study types. **(A)**, Based on the data from prospective interventional studies, the estimated GA effective radius growth rate was 0.179 mm/year (95%CI = 0.159-0.199 mm/year). **(B)**, Based on the data from prospective observational studies, the estimated GA effective radius growth rate was 0.193 mm/year (95%CI = 0.166-0.220 mm/year). **(C)**, The GA effective radius growth rates (error bars = standard errors) determined from the 2 study types were comparable ( $P = 0.56$ ), suggesting that different study types did not significantly affect the estimated GA growth rate. CI = confidence interval.
