# Supplementary material for: Topographic Variation of the Growth Rate of Geographic Atrophy in Nonexudative Age-Related Macular Degeneration: A Systematic Review and Meta-analysis
Source: PubMed Central journal article supplement — Invest Ophthalmol Vis Sci. 2020 Jan 29;61(1):2. doi: 10.1167/iovs.61.1.2 (PMC7205189; doi:10.1167/iovs.61.1.2), 2020-01-29
Supplement: iovs-61-1-2_s006.pdf [file iovs-61-1-2_s006.pdf]

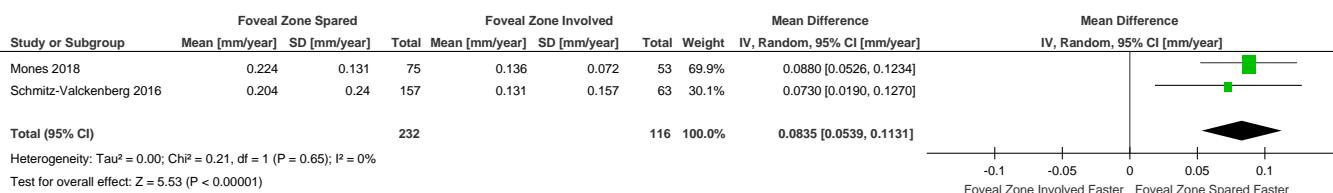

**Figure S6.** Comparison in GA effective radius growth rate between foveal zone spared (FZS) and foveal zone involved (FZI) in prospective observational studies. After the removal of 1 retrospective observational study (Allingham et al. 2016), the estimated difference in the GA effective radius growth rate between FZS and FZI (0.084 mm/year; 95%CI = 0.054-0.113 mm/year) was very close to the estimated difference shown in Figure 2B (0.082 mm/year; 95%CI = 0.053-0.111 mm/year).
