# Supplementary material for: Topographic Variation of the Growth Rate of Geographic Atrophy in Nonexudative Age-Related Macular Degeneration: A Systematic Review and Meta-analysis
Source: PubMed Central journal article supplement — Invest Ophthalmol Vis Sci. 2020 Jan 29;61(1):2. doi: 10.1167/iovs.61.1.2 (PMC7205189; doi:10.1167/iovs.61.1.2), 2020-01-29
Supplement: iovs-61-1-2_s007.pdf [file iovs-61-1-2_s007.pdf]

### A. GA Effective Radius Growth Rate in Studies Using Fundus Autofluorescence

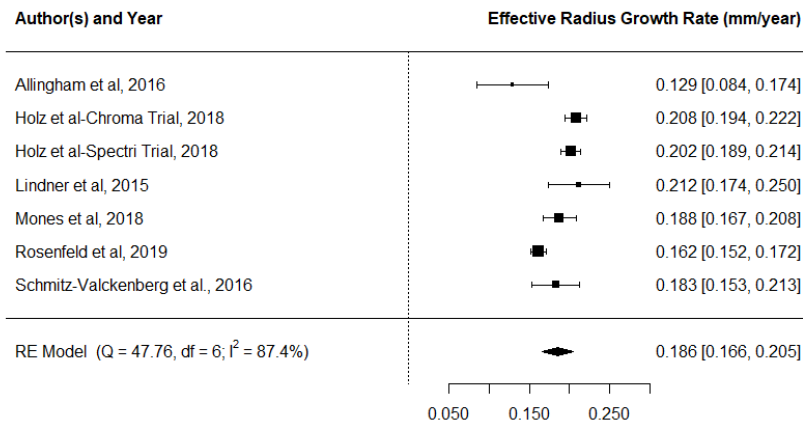

### B. GA Effective Radius Growth Rate in Studies Using Color Fundus Photography

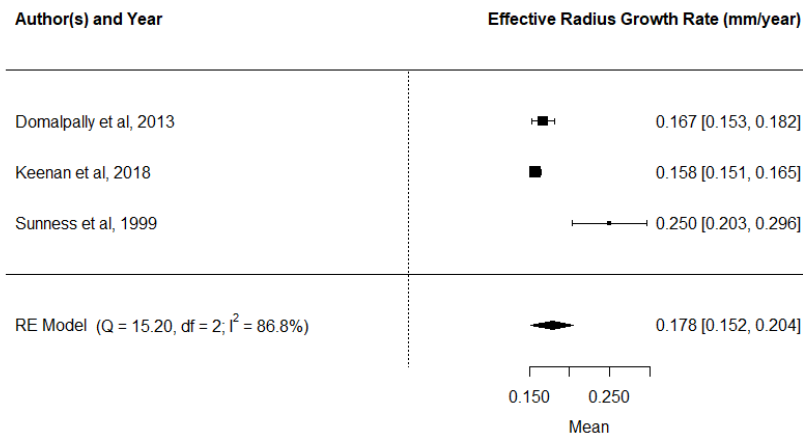

### C. Comparison in GA Effective Radius Growth Rate Between Imaging Modalities

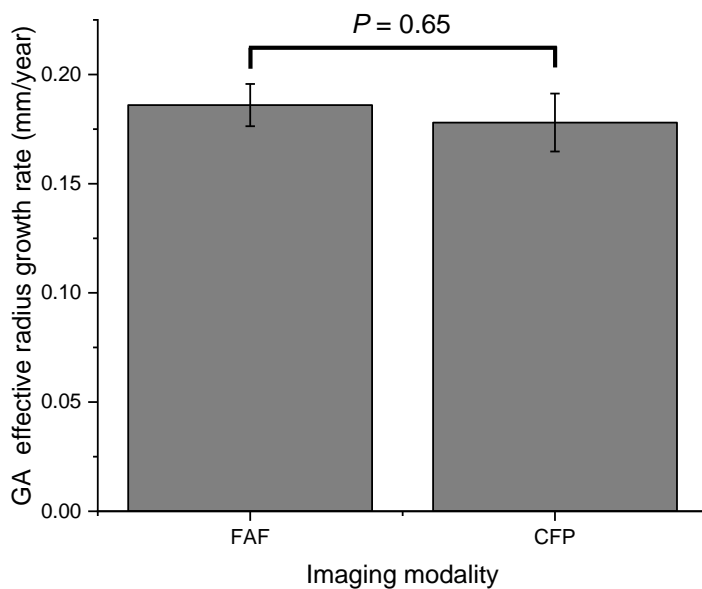

**Figure S7.** GA effective radius growth rate based on imaging modalities. **(A)**, Based on data from studies using fundus autofluorescence, the estimated GA effective radius growth rate was 0.186 mm/year (95%CI = 0.166-0.205 mm/year). **(B)**, Based on data from studies using color fundus photography, the estimated GA effective radius growth rate was 0.178 mm/year (95%CI = 0.152-0.204 mm/year). **(C)**, The GA effective radius growth rates (error bars = standard errors) assessed by the 2 imaging modalities were comparable ( $P = 0.65$ ), suggesting that different imaging modalities did not significantly affect the estimated GA effective radius growth rate. CFP = color fundus photography; CI = confidence interval; FAF = fundus autofluorescence.
