# Supplementary material for: Topographic Variation of the Growth Rate of Geographic Atrophy in Nonexudative Age-Related Macular Degeneration: A Systematic Review and Meta-analysis
Source: PubMed Central journal article supplement — Invest Ophthalmol Vis Sci. 2020 Jan 29;61(1):2. doi: 10.1167/iovs.61.1.2 (PMC7205189; doi:10.1167/iovs.61.1.2), 2020-01-29
Supplement: iovs-61-1-2_s008.pdf [file iovs-61-1-2_s008.pdf]

**A. Comparison Between CPS and CPI in Studies Using Fundus Autofluorescence**

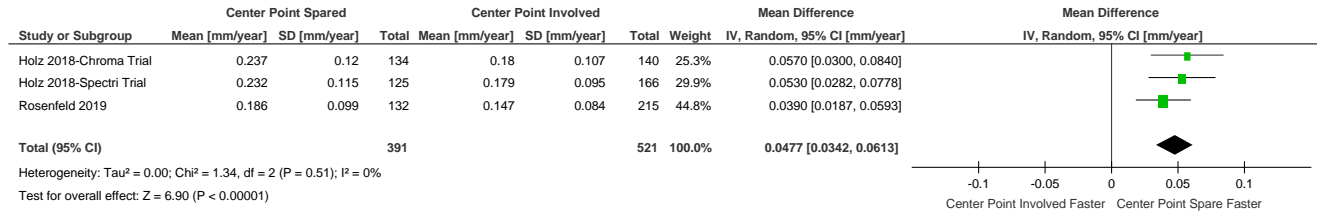

**B. Comparison Between CPS and CPI in Studies Using Color Fundus Photography**

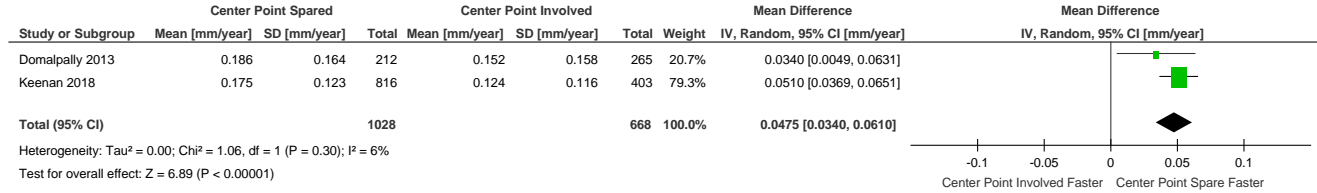

**Figure S8.** Random-effects meta-analysis comparing the effective radius growth rates (in mm/year) between center point involved (CPI) and spared (CPS) GA lesions based on imaging modalities. **(A)**, The estimated difference in the GA growth rate between CPI and CPS was 0.048 mm/year (95%CI = 0.034-0.061 mm/year) based on studies using fundus autofluorescence, which was very close to **(B)**, the estimated difference using data from studies using color fundus photography (0.048 mm/year; 95%CI = 0.034-0.061 mm/year). The data suggest that different imaging modalities did not significantly affect the estimated difference in the GA growth rate between GA location groups. CI = confidence interval.
