# Supplementary material for: Topographic Variation of the Growth Rate of Geographic Atrophy in Nonexudative Age-Related Macular Degeneration: A Systematic Review and Meta-analysis
Source: PubMed Central journal article supplement — Invest Ophthalmol Vis Sci. 2020 Jan 29;61(1):2. doi: 10.1167/iovs.61.1.2 (PMC7205189; doi:10.1167/iovs.61.1.2), 2020-01-29
Supplement: iovs-61-1-2_s009.pdf [file iovs-61-1-2_s009.pdf]

Supplementary Figure S9

A. Integrated GA Growth Rate Follows a Sigmoidal Curve vs. Retinal Eccentricity

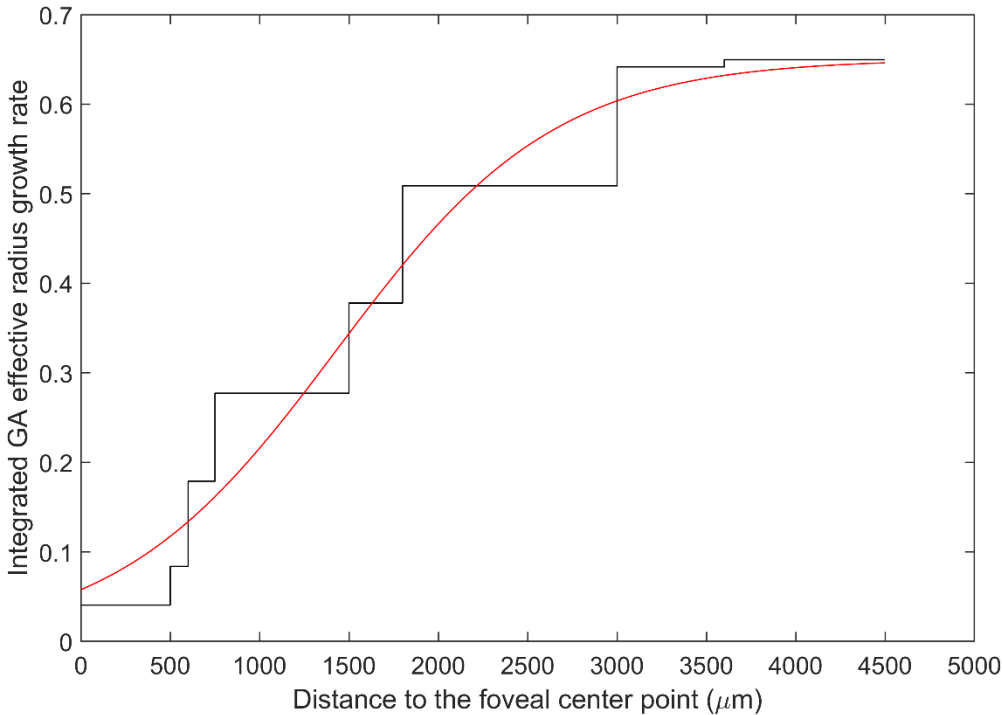

B. Gaussian Fits of the GA Growth Rate as a Function of Retinal Eccentricity

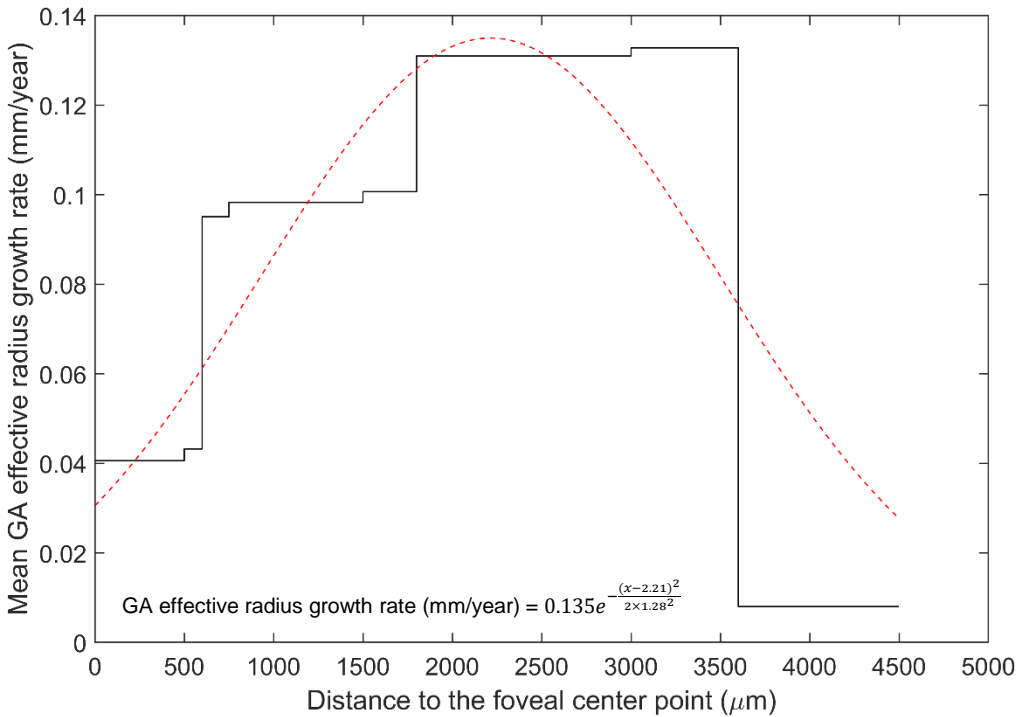

**Figure S9.** Mathematical modeling of the GA effective radius growth rate as a function of distance to the foveal center point (i.e. retinal eccentricity in μm). **(A)** The integration of the GA effective radius growth rate with respect to the retinal eccentricity follows a sigmoidal curve, suggesting a Gaussian-like distribution of the GA effective radius growth rate as a function of retinal eccentricity. **(B)** The topographic profile of GA effective radius growth rate fits a Gaussian function. If we remove the data in Lindner et al. from the analysis, the Gaussian function is relatively unchanged ( $0.138e^{-\frac{(x-2.30)^2}{2 \times 1.19^2}}$ ). GA, geographic atrophy.
