# Supplementary material for: Topographic Variation of the Growth Rate of Geographic Atrophy in Nonexudative Age-Related Macular Degeneration: A Systematic Review and Meta-analysis
Source: PubMed Central journal article supplement — Invest Ophthalmol Vis Sci. 2020 Jan 29;61(1):2. doi: 10.1167/iovs.61.1.2 (PMC7205189; doi:10.1167/iovs.61.1.2), 2020-01-29
Supplement: iovs-61-1-2_s013.pdf [file iovs-61-1-2_s013.pdf]

Supplementary Table S3.

Study Quality and Risk Assessment

| Study authors and year of publication                                            | Selection <sup>†</sup>                           |                           |                                                                          | Comparability                                                          | Outcome                                                   |                                                 |                                  |
|----------------------------------------------------------------------------------|--------------------------------------------------|---------------------------|--------------------------------------------------------------------------|------------------------------------------------------------------------|-----------------------------------------------------------|-------------------------------------------------|----------------------------------|
|                                                                                  | Representativeness of the exposed cohort         | Ascertainment of exposure | Demonstration that outcome of interest was not present at start of study |                                                                        | Assessment of outcome                                     | Was follow-up long enough for outcomes to occur | Adequacy of follow up of cohorts |
| <b>Studies with GA Progression Data of Center-sparing and Center-involved GA</b> |                                                  |                           |                                                                          |                                                                        |                                                           |                                                 |                                  |
| Domalpally et al., 2013<br>AREDS                                                 | *                                                | *                         | *                                                                        | Did not control for other ocular diseases<br>*                         | *                                                         | *                                               | *                                |
| Holz et al., 2018<br>Chroma<br>NCT02247479                                       | Only included bilateral GA                       | *                         | *                                                                        | **                                                                     | *                                                         | *                                               | *                                |
| Holz et al., 2018<br>Spectri<br>NCT02247531                                      | Only included bilateral GA                       | *                         | *                                                                        | **                                                                     | *                                                         | *                                               | *                                |
| Keenan et al., 2018<br>AREDS2                                                    | *                                                | *                         | *                                                                        | **                                                                     | *                                                         | *                                               | *                                |
| Rosenfeld et al., 2019<br>SEATTLE<br>NCT01802866                                 | *                                                | *                         | *                                                                        | **                                                                     | *                                                         | *                                               | *                                |
| <b>Studies with GA Progression Data of Fovea-sparing and Fovea-involved GA</b>   |                                                  |                           |                                                                          |                                                                        |                                                           |                                                 |                                  |
| Allingham et al., 2016                                                           | *                                                | *                         | *                                                                        | *<br>Did not define "foveal and extrafoveal lesions"                   | *                                                         | *                                               | *                                |
| Monés et al., 2018<br>GAIN<br>NCT01694095                                        | *                                                | *                         | *                                                                        | *<br>Did not define "foveal and extrafoveal lesions"                   | *                                                         | *                                               | *                                |
| Schmitz-Valckenberg et al., 2016<br>GAP<br>NCT00599846                           | *                                                | *                         | *                                                                        | **                                                                     | *                                                         | *                                               | *                                |
| <b>Studies with GA Progression Data in ≥ 2 Topographic Regions</b>               |                                                  |                           |                                                                          |                                                                        |                                                           |                                                 |                                  |
| Lindner et al., 2015<br>FAM<br>NCT00393692                                       | Only included eyes with GA that spares the fovea | *                         | *                                                                        | **                                                                     | Did not assess GA area in clearly predefined regions<br>* | *                                               | *                                |
| Mauschitz et al., 2012<br>GAP<br>NCT00599846                                     | *                                                | *                         | *                                                                        | **                                                                     | *                                                         | *                                               | *                                |
| Sayegh et al., 2017                                                              | *                                                | *                         | *                                                                        | **                                                                     | *                                                         | *                                               | *                                |
| Sunness et al., 1999                                                             | *                                                | *                         | *                                                                        | *<br>Definition of the Central zone was much larger than other studies | *                                                         | *                                               | *                                |

GA, geographic atrophy;

<sup>†</sup>"Selection of the non exposed cohort" in the original NOS is not applicable to our study and thus not included in the quality assessment.
