# Supplementary material for: Topographic Variation of the Growth Rate of Geographic Atrophy in Nonexudative Age-Related Macular Degeneration: A Systematic Review and Meta-analysis
Source: PubMed Central journal article supplement — Invest Ophthalmol Vis Sci. 2020 Jan 29;61(1):2. doi: 10.1167/iovs.61.1.2 (PMC7205189; doi:10.1167/iovs.61.1.2), 2020-01-29
Supplement: iovs-61-1-2_s014.pdf [file iovs-61-1-2_s014.pdf]

**Supplementary Table S4.**  
**Extrapolated GA Effective Radius Growth Rate in 8 Topographic Zones**

| <b>Extrapolated Zones in Distance from the Foveal Center (um)</b> | <b>Estimated Mean GA Effective Radius Growth Rate (mm/year)*</b> | <b>Data Used for Extrapolation (Study and Topographic Zones)</b>                                                                                                          |
|-------------------------------------------------------------------|------------------------------------------------------------------|---------------------------------------------------------------------------------------------------------------------------------------------------------------------------|
| 0-500                                                             | 0.0406                                                           | Lindner et al., 2015 (residual foveal island <sup>†</sup> )<br>Mauschitz et al., 2012 (0-600um)<br>Sayegh et al., 2017 (0-500um)<br>Sunness et al., 1999 (0-1800um)       |
| 500-600                                                           | 0.0432                                                           | Lindner et al., 2015 (residual foveal island <sup>†</sup> )<br>Mauschitz et al., 2012 (0-600um)<br>Sayegh et al., 2017 (500-1500um)<br>Sunness et al., 1999 (0-1800um)    |
| 600-750                                                           | 0.0951                                                           | Lindner et al., 2015 (residual foveal island <sup>†</sup> )<br>Mauschitz et al., 2012 (600-1800um)<br>Sayegh et al., 2017 (500-1500um)<br>Sunness et al., 1999 (0-1800um) |
| 750-1500                                                          | 0.0983                                                           | Mauschitz et al., 2012 (600-1800um)<br>Sayegh et al., 2017 (500-1500um)<br>Sunness et al., 1999 (0-1800um)                                                                |
| 1500-1800                                                         | 0.1007                                                           | Mauschitz et al., 2012 (600-1800um)<br>Sayegh et al., 2017 (1500-3000um)<br>Sunness et al., 1999 (0-1800um)                                                               |
| 1800-3000                                                         | 0.1310                                                           | Mauschitz et al., 2012 (1800-3600um)<br>Sayegh et al., 2017 (1500-3000um)                                                                                                 |
| 3000-3600                                                         | 0.1328                                                           | Mauschitz et al., 2012 (1800-3600um)                                                                                                                                      |
| >3600                                                             | 0.0077                                                           | Mauschitz et al., 2012 (>3600um)                                                                                                                                          |

\* The estimated GA effective radius growth rate in each zone is calculated as the weighted mean of the GA effective radius growth rates in the zones reported in studies shown in the right column. For example, the GA effective radius growth rate in the first zone (0-500 um) =  $\frac{(47 \times 0.065 + 316 \times 0.012 + 36 \times 0.052 + 81 \times 0.133)}{(47 + 316 + 36 + 81)}$ .

<sup>†</sup> Since the definition of residual foveal island was not specified in Lindner et al., 2015, we used the reported average radius of the fovea (750 um) as the cut-off distance from the foveal center for this region.
